# Supplementary material for: Surface seiches in Flathead Lake
Source: Copernicus journal article supplement (doi:10.5194/hess-19-2605-2015), 2015-06-03
Supplement: Supplementary file 2 [file hess-19-2605-2015-supplement-cover-letter.pdf › hess-19-2605-2015-supplement-cover-letter.pdf]

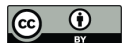

## *Supplement of*

# Surface seiches in Flathead Lake

**G. Kirillin et al.**

*Correspondence to:* G. Kirilin ([kirillin@igb-berlin.de](mailto:kirillin@igb-berlin.de))

- [hess-19-2605-2015-supplement-cover-letter.pdf](#)
- Suppl1
  - [KLLGSuppl.pdf](#)
- Suppl2
  - 101.gif
  - 102.gif
  - 103.gif
  - 104.gif
  - 105.gif
  - 106.gif
  - 107.gif
  - 108.gif
  - 109.gif
  - 110.gif
  - 111.gif
  - 112.gif
  - 113.gif
  - 114.gif
  - FlatheadModes.htm

The copyright of individual parts of the supplement might differ from the CC-BY 3.0 licence.
